# Supplementary material
Source: publisher figshare collection journal article supplement (https://rs.figshare.com/ndownloader/files/18613691)
Supplement: Supplementary file 1 [file 18613691]

## Sheet: VTL Calculator
	Enter formant measurements here					Enter slope y in G4
	Formant 1	Formant 2	Formant 3	Formant 4			VTL length output
	0.5	1.5	2.5	3.5		∆F	VTL
Vowel	281	2239	3078	4273		1245	14.0562
Title: Dogs perceive and spontaneously normalise formant-related speaker and vowel differences in human speech sounds
Authors: Holly Root-Gutteridge, Victoria F. Ratcliffe, Anna T. Korzeniowska, David Reby
